# Supplementary material for: Association of Chronic Myelogenous (Basophilic) Leukemia and the BCR/ABL Mutation in a Yucatan Barrow (Sus scrofa domestica)
Source: PubMed Central journal article supplement (PMC7674400; doi:10.3389/fvets.2020.575199), 2020-11-05
Supplement: Table_1.pdf [file Table_1.pdf]

| Antibody       | Label                      | Marker                        | Host species | Target species | Manufacturer  |
|----------------|----------------------------|-------------------------------|--------------|----------------|---------------|
| CD4 $\alpha$   | PerCP-Cy <sup>TM</sup> 5.5 | T Lymphocyte                  | Murine       | Porcine        | BD Bioscience |
| CD3 $\epsilon$ | FITC                       | T Lymphocyte                  | Murine       | Porcine        | BD Bioscience |
| CD8 $\alpha$   | PE                         | T Lymphocyte & Natural Killer | Murine       | Porcine        | BD Bioscience |
| CD21           | APC                        | B Cells                       | Murine       | Anti-Human     | BD Bioscience |

**Supplementary Table 1:** Flow cytometric markers
